# Supplementary material for: Transcriptomic Characterization of Cow, Donkey and Goat Milk Extracellular Vesicles Reveals Their Anti-inflammatory and Immunomodulatory Potential
Source: MDPI journal article supplement (doi:10.3390/ijms222312759), 2021-11-25
Supplement: s1 [file s1]

**Table S6.** Targets and central nodes (in bold the ones shared by all species; underlined the ones shared by Donkey and Goat).

| Species | Targets                                                                                                           | Central nodes |
|---------|-------------------------------------------------------------------------------------------------------------------|---------------|
| Cow     | YOD1 MFSD8 MDM4                                                                                                   | <b>MDM5</b>   |
|         |                                                                                                                   | YOD1          |
|         |                                                                                                                   | MFSD8         |
| Donkey  | ZNF264 MDM4 IKZF3<br>ZNF644 ZNF587 ZBTB37<br>YOD1 SOCS7 RBM12B<br>PRORP LCOR FAM104A<br>CSNK2A1 ADIPOR2<br>CEP120 | CSNK2A1       |
|         |                                                                                                                   | IKZF3         |
|         |                                                                                                                   | ZNF587        |
|         |                                                                                                                   | CEP120        |
|         |                                                                                                                   | ZNF644        |
|         |                                                                                                                   | LCOR          |
|         |                                                                                                                   | <b>MDM4</b>   |
|         |                                                                                                                   | <u>SOCS4</u>  |
| Goat    | YOD1 ZNF264 MDM4<br>AGO-01 ZBTB37 SOCS7<br>MFSD8 KPNA6 CEBPG<br>BZW1 ATXN1 ARIH1<br>KMT2D EPHA4                   | ATXN1         |
|         |                                                                                                                   | KPNA6         |
|         |                                                                                                                   | ARIH1         |
|         |                                                                                                                   | KMT2D         |
|         |                                                                                                                   | <b>MDM4</b>   |
|         |                                                                                                                   | <u>SOCS4</u>  |
|         |                                                                                                                   | ZNF264        |
|         |                                                                                                                   | EPHA4         |
