# Supplementary material for: Transcriptomic Characterization of Cow, Donkey and Goat Milk Extracellular Vesicles Reveals Their Anti-inflammatory and Immunomodulatory Potential
Source: MDPI journal article supplement (doi:10.3390/ijms222312759), 2021-11-25
Supplement: s1 [file s1]

Udder from SRA archive and mEV gene set comparison.

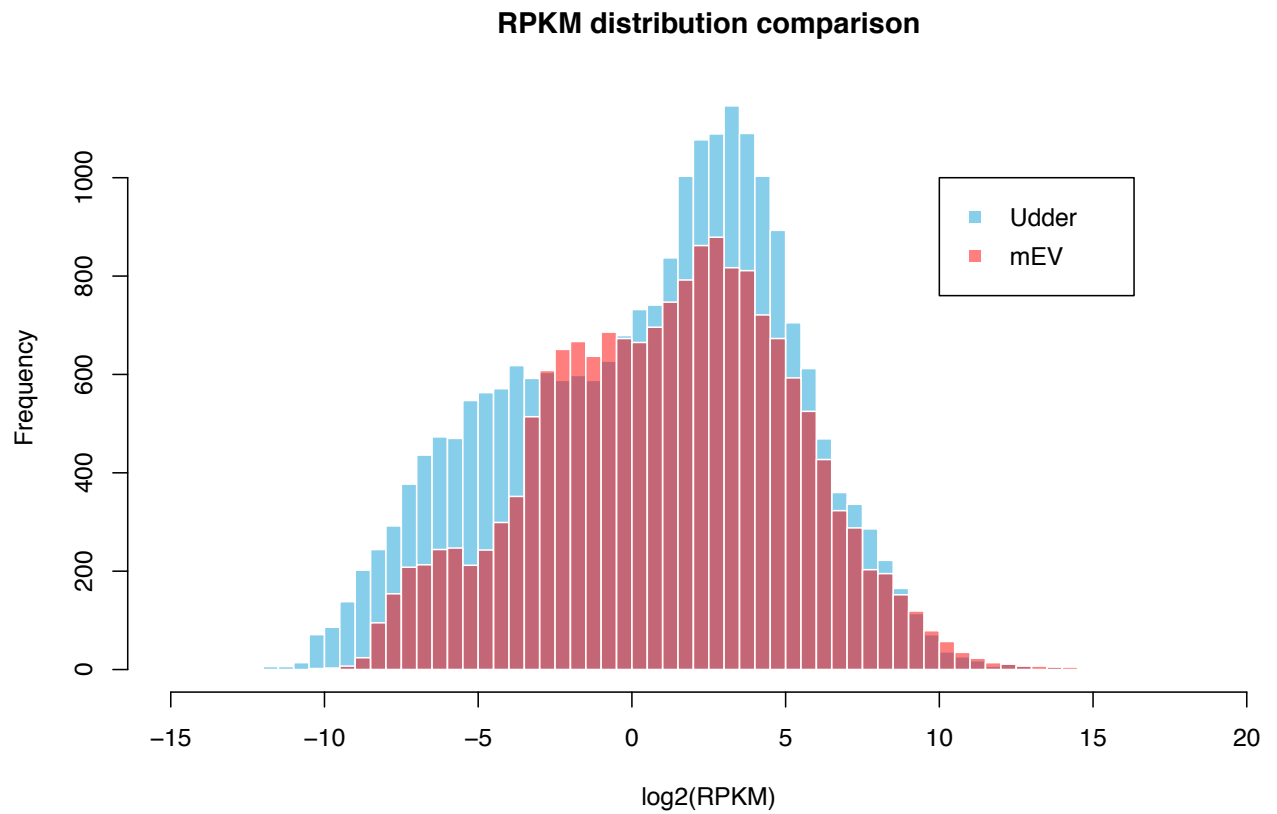

**Figure S1.** Histogram of RPKM mean for udder data (blue) downloaded from SRA database (BioSamples: SAMN12831050, SAMN12831049, SAMN14600526 and SAMN14600525) and mEV gene set (red).
