# Supplementary material for: Transcriptomic Characterization of Cow, Donkey and Goat Milk Extracellular Vesicles Reveals Their Anti-inflammatory and Immunomodulatory Potential
Source: MDPI journal article supplement (doi:10.3390/ijms222312759), 2021-11-25
Supplement: s1 [file s1]

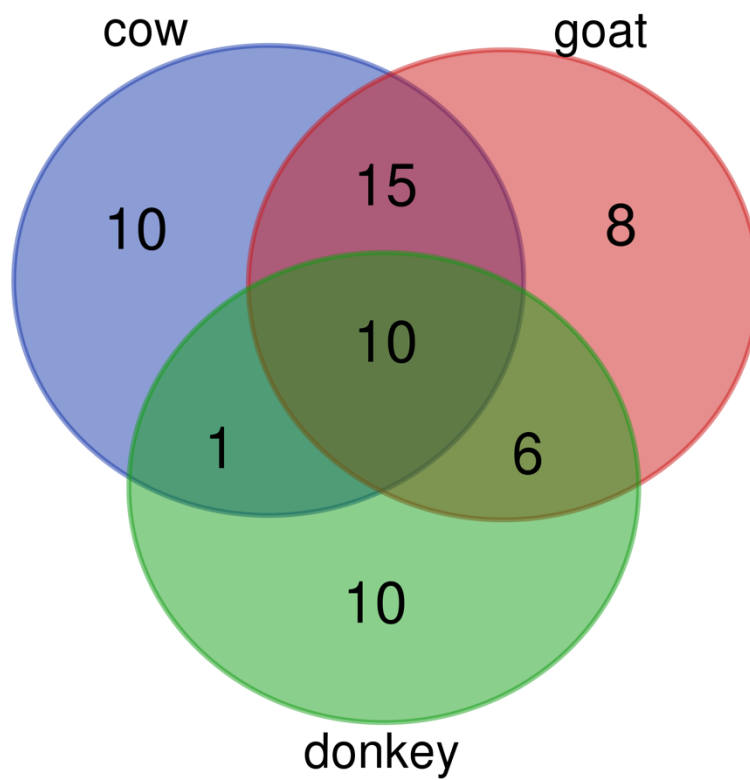

**Figure S4.** Venn Diagram representing consistencies of shared miRNAs among the highly expressed (covered by 95% RPKM) in mEVs of the three species.
