# Supplementary figures and images for: Transcriptomic Characterization of Cow, Donkey and Goat Milk Extracellular Vesicles Reveals Their Anti-inflammatory and Immunomodulatory Potential
Source: MDPI journal article supplement (doi:10.3390/ijms222312759), 2021-11-25

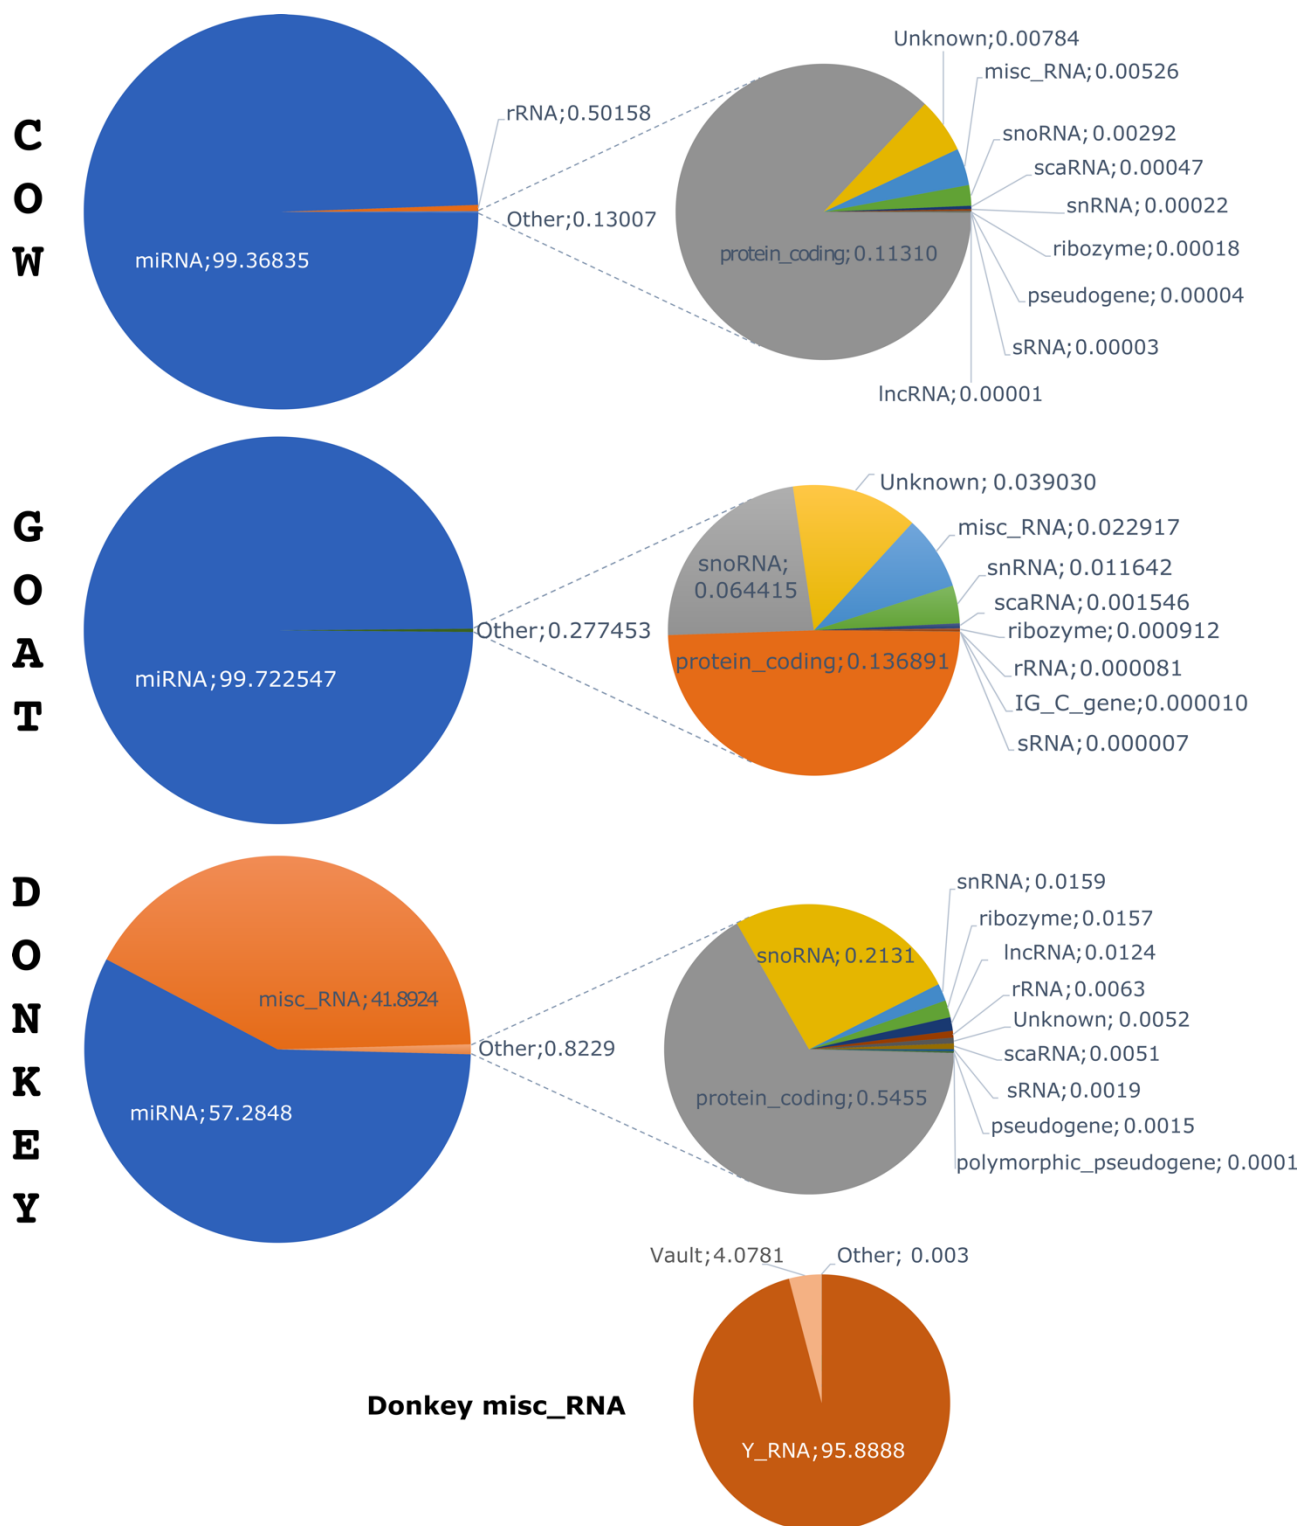

**Figure S3.** Small RNA features in cow, goat and donkey mEVs.

Supplement: s1 [file s1]

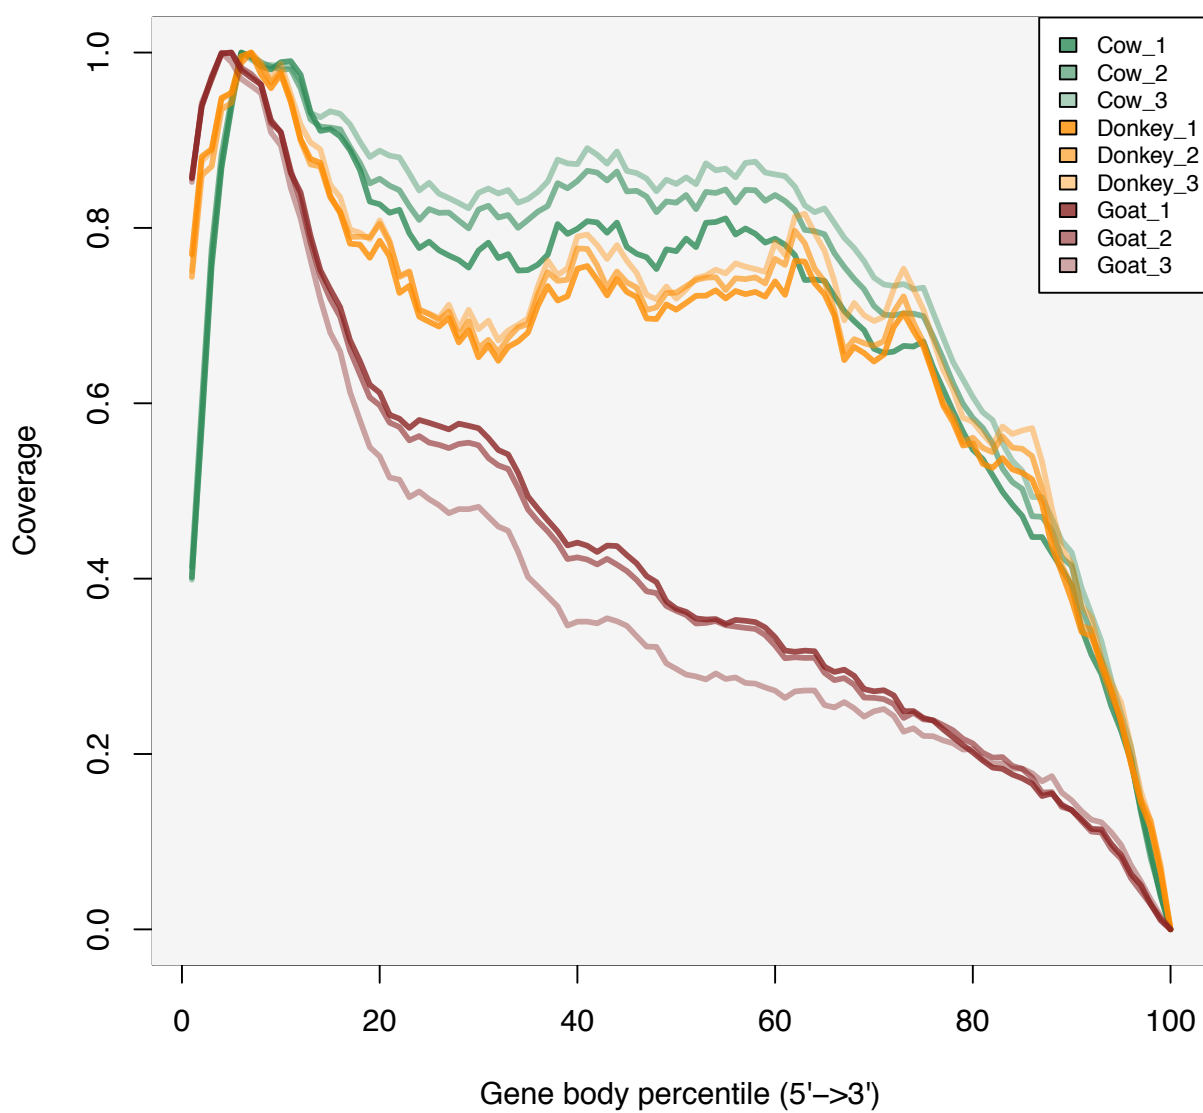

**Figure S2.** Gene body coverage for mRNA mEV cargo of the three species.

Supplement: s1 [file s1]
